# Supplementary material for: Design-specific mechanistic regulation of the sensing phenomena of two Schiff bases towards Al3+
Source: Royal Society of Chemistry journal article supplement (doi:10.1039/c6ra01385f), 2016-01-01

## *Electronic Supplementary Information*

### **Design specific mechanistic regulation of sensing phenomenon of two Schiff bases towards $\text{Al}^{3+}$**

Shweta,<sup>a</sup> Neeraj,<sup>a</sup> Sharad Kumar Asthana,<sup>a</sup> Rakesh K. Mishra<sup>b</sup> and K.K. Upadhyay<sup>a\*</sup>

<sup>a</sup>*Department of Chemistry, (Centre of Advanced Study), Institute of Science, Banaras Hindu University, Varanasi, Uttar Pradesh-221005, India.*

<sup>b</sup>*Photosciences and Photonics, Chemical Sciences and Technology Division, CSIR–National Institute for Interdisciplinary Science and Technology, Thiruvananthapuram-695019, India.*

*E-mail: drkaushalbhu@yahoo.co.in; kku@bhu.ac.in, Tel No.: +91-542-6702488*

---

## **EXPERIMENTAL**

### **1.1 Apparatus:**

The IR Spectra for the receptors **R1** and **R2** were recorded on JASCO-FTIR Spectrophotometer while  $^1\text{H}$  NMR and  $^{13}\text{C}$  NMR spectra for the same were recorded on a JEOL AL 300 FT NMR Spectrometer. Mass spectrometric analysis was carried out on Bruker amaZon SL spectrometer in the ultrascan mode (Bruker Daltonics, Bremen, Germany). Electronic spectra were recorded at room temperature (298 K) on a UV-1700 pharماسpec spectrophotometer with quartz cuvette (path length = 1 cm). Emission spectra were recorded on JY HORIBA Fluorescence spectrophotometer.

### **1.2 Materials:**

All reagents for synthesis were purchased from Sigma-Aldrich and were used without further purification.

### **1.3 General Methods:**

All titration experiments were carried at room temperature. All the cations were used as their chloride salts. The  $^1\text{H}$  NMR spectra were recorded by using tetramethylsilane (TMS) as an internal reference standard. For the  $^1\text{H}$  NMR titration spectra of **R1** and **R2**,  $5 \times 10^{-3}$  M solutions was prepared in  $\text{DMSO}-d_6$  while the stock solution of  $\text{Al}^{3+}$  was prepared in  $\text{D}_2\text{O}$ . For UV-visible / fluorescence titration experiments, the solutions of cations were prepared in aqueous medium. Chloride salt of metal ions was used for solution preparation. The stock solution of **R1** and **R2** both  $1.0 \times 10^{-3}$  M was prepared in DMSO which was used for fluorescence titration experiment in ethanol: water (4: 1, v/v).

## *Electronic Supplementary Information*

### **1.4. Determination of Detection limits:**

The detection limit of **R1** and **R2** for  $\text{Al}^{3+}$  were calculated using fluorescence titration data according to the IUPAC definition. The detection limits of **R1** and **R2** as a fluorogenic sensor for the analysis of  $\text{Al}^{3+}$  were calculated from a plot of fluorescence intensity as a function of the concentration of the added  $\text{Al}^{3+}$  ion. To determine the S/N ratio, the fluorescence intensity of **R1** and **R2** without  $\text{Al}^{3+}$  was measured by 10 times and the standard deviation of blank measurements was determined. The detection was calculated as three times the standard deviation from the blank measurement (in the absence of  $\text{Al}^{3+}$  ion) divided by the slope of calibration plot between  $\text{Al}^{3+}$  ion concentration fluorescence intensity.

### **TABLE OF CONTENTS**

| S. No. | Figure            | Caption                                                                                       | Page No.   |
|--------|-------------------|-----------------------------------------------------------------------------------------------|------------|
| 1.     |                   | <b>Experimental section</b>                                                                   | <b>1-2</b> |
| 2.     | <b>Figure S1</b>  | $^1\text{H}$ NMR spectrum of <b>R1</b> (in $\text{DMSO}-d_6$ ).                               | <b>4</b>   |
| 3.     | <b>Figure S2</b>  | $^{13}\text{C}$ NMR spectrum of <b>R1</b> (in $\text{DMSO}-d_6$ ).                            | <b>5</b>   |
| 4.     | <b>Figure S3</b>  | IR spectrum of <b>R1</b> .                                                                    | <b>6</b>   |
| 5.     | <b>Figure S4</b>  | HRMS of <b>R1</b> .                                                                           | <b>7</b>   |
| 6.     | <b>Figure S5</b>  | $^1\text{H}$ NMR spectrum of <b>R2</b> (in $\text{DMSO}-d_6$ ).                               | <b>8</b>   |
| 7.     | <b>Figure S6</b>  | $^{13}\text{C}$ NMR spectrum of <b>R2</b> (in $\text{DMSO}-d_6$ ).                            | <b>9</b>   |
| 8.     | <b>Figure S7</b>  | IR spectrum of <b>R2</b> .                                                                    | <b>10</b>  |
| 9.     | <b>Figure S8</b>  | HRMS of <b>R2</b> .                                                                           | <b>11</b>  |
| 10.    | <b>Figure S9</b>  | $^1\text{H}$ NMR spectrum of <b>R1</b> - $\text{Al}^{3+}$ Complex (in $\text{DMSO}-d_6$ ).    | <b>12</b>  |
| 11.    | <b>Figure S10</b> | $^{13}\text{C}$ NMR spectrum of <b>R1</b> - $\text{Al}^{3+}$ Complex (in $\text{DMSO}-d_6$ ). | <b>13</b>  |
| 12.    | <b>Figure S11</b> | IR spectrum of <b>R1</b> - $\text{Al}^{3+}$ .                                                 | <b>14</b>  |
| 13.    | <b>Figure S12</b> | HRMS of <b>R1</b> - $\text{Al}^{3+}$ .                                                        | <b>15</b>  |
| 14.    | <b>Figure S13</b> | $^1\text{H}$ NMR spectrum of <b>R2</b> - $\text{Al}^{3+}$ Complex (in $\text{DMSO}-d_6$ ).    | <b>16</b>  |
| 15.    | <b>Figure S14</b> | $^{13}\text{C}$ NMR spectrum of <b>R2</b> - $\text{Al}^{3+}$ Complex (in $\text{DMSO}-d_6$ ). | <b>17</b>  |
| 16.    | <b>Figure S15</b> | IR spectrum of <b>R2</b> - $\text{Al}^{3+}$ .                                                 | <b>18</b>  |
| 17.    | <b>Figure S16</b> | HRMS of <b>R2</b> - $\text{Al}^{3+}$ complex.                                                 | <b>19</b>  |

## *Electronic Supplementary Information*

|            |                   |                                                                                                                                 |           |
|------------|-------------------|---------------------------------------------------------------------------------------------------------------------------------|-----------|
| <b>18.</b> | <b>Figure S17</b> | Visible color responses of <b>R2</b> in the presence of various metal ions in ethanol-water (4: 1, v/v) solution.               | <b>20</b> |
| <b>19.</b> | <b>Figure S18</b> | UV–visible spectrum of <b>R2</b> (10 $\mu$ M) with different metal ions at in ethanol-water (4: 1, v/v) solution.               | <b>20</b> |
| <b>20.</b> | <b>Figure S19</b> | Visible color responses of <b>R1</b> in the presence of various metal ions in ethanol-water (4: 1, v/v) solution.               | <b>21</b> |
| <b>21.</b> | <b>Figure S20</b> | UV–visible spectrum of <b>R1</b> (10 $\mu$ M) with different metal ions at in ethanol-water (4:1, v/v) solution.                | <b>21</b> |
| <b>22.</b> | <b>Figure S21</b> | Bar graph of emission spectrum showing competition experiment of <b>R1</b> . $\text{Al}^{3+}$ ensemble with various metal ions. | <b>22</b> |
| <b>23.</b> | <b>Figure S22</b> | Bar graph of emission spectrum showing competition experiment of <b>R2</b> . $\text{Al}^{3+}$ ensemble with various metal ions. | <b>22</b> |
| <b>24.</b> | <b>Figure S23</b> | The variation in fluorescence intensity in <b>R1</b> with the change in pH in the presence of $\text{Al}^{3+}$ .                | <b>23</b> |
| <b>25.</b> | <b>Figure S24</b> | The variation in fluorescence intensity in <b>R2</b> with the change in pH in the presence of $\text{Al}^{3+}$ .                | <b>23</b> |
| <b>24.</b> | <b>Figure S25</b> | Job Plot of <b>R1</b> with $\text{Al}^{3+}$ showing 1:1 binding stoichiometry.                                                  | <b>24</b> |
| <b>25.</b> | <b>Figure S26</b> | Job Plot of <b>R2</b> with $\text{Al}^{3+}$ showing 1:1 binding stoichiometry.                                                  | <b>24</b> |
| <b>26.</b> | <b>Figure S27</b> | Non-linear fit plot of <b>R1</b> from fluorescence titration data.                                                              | <b>25</b> |
| <b>27.</b> | <b>Figure S28</b> | Non-linear fit plot of <b>R2</b> from fluorescence titration data.                                                              | <b>25</b> |
| <b>28.</b> | <b>Figure S29</b> | Calibration curve for determination of detection limit of <b>R1</b> for $\text{Al}^{3+}$ .                                      | <b>26</b> |
| <b>29.</b> | <b>Figure 30</b>  | Calibration curve for determination of detection limit of <b>R2</b> for $\text{Al}^{3+}$ .                                      | <b>26</b> |
| <b>30.</b> | <b>Figure S31</b> | Theoretically optimised structure of <b>R1</b> and <b>R1</b> - $\text{Al}^{3+}$ ensemble.                                       | <b>27</b> |
| <b>31.</b> | <b>Figure S32</b> | Theoretically optimised structure of <b>R2</b> and <b>R2</b> - $\text{Al}^{3+}$ ensemble.                                       | <b>27</b> |

## Electronic Supplementary Information

**Figure S1:**  $^1\text{H}$  NMR spectrum of **R1** (in  $\text{DMSO-}d_6$ ):

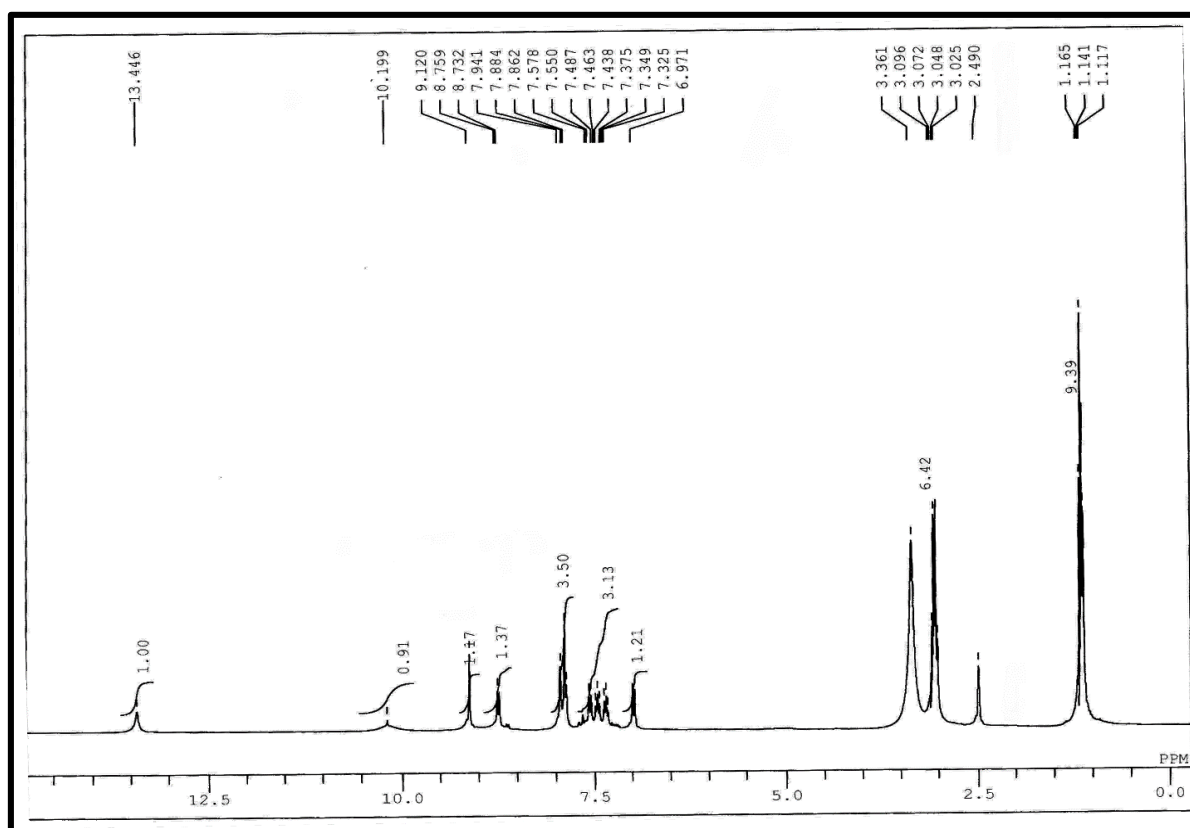

## Electronic Supplementary Information

**Figure S2:**  $^{13}\text{C}$  NMR spectrum of **R1** (in  $\text{DMSO-}d_6$ ):

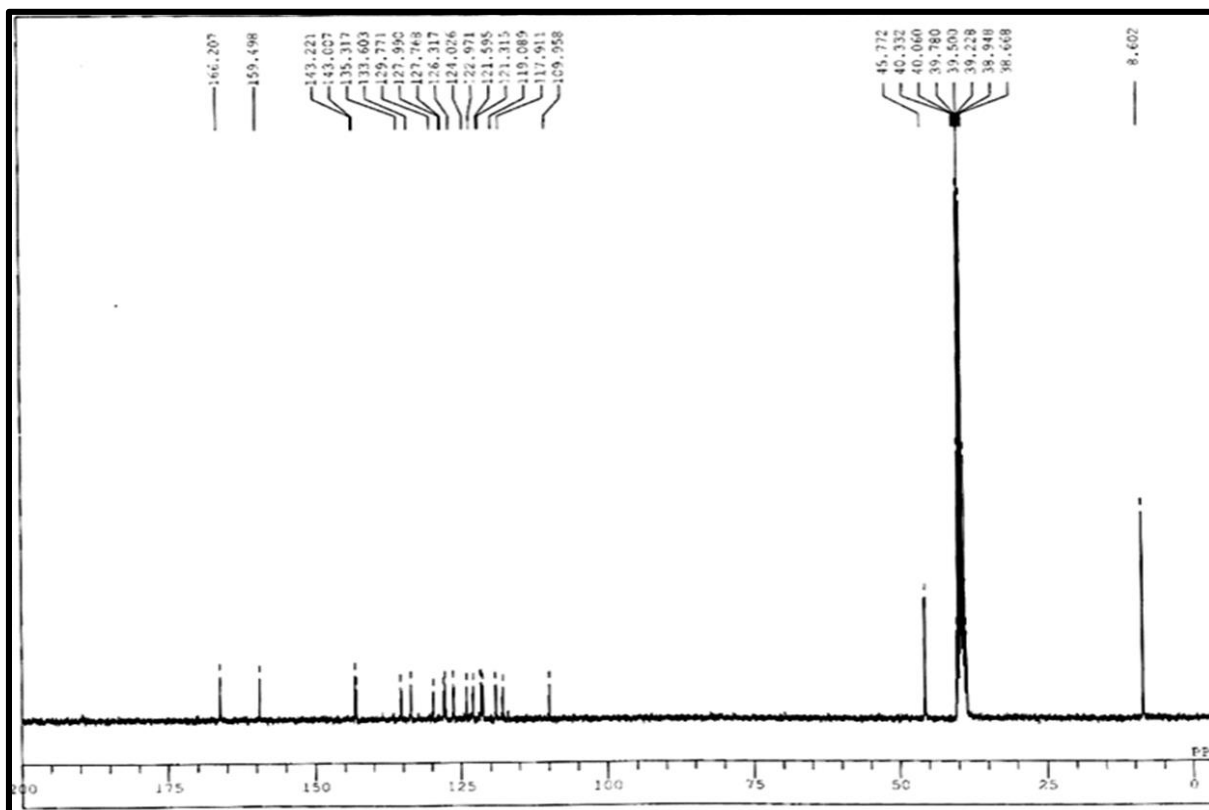

## Electronic Supplementary Information

**Figure S3:** IR spectrum of **R1**:

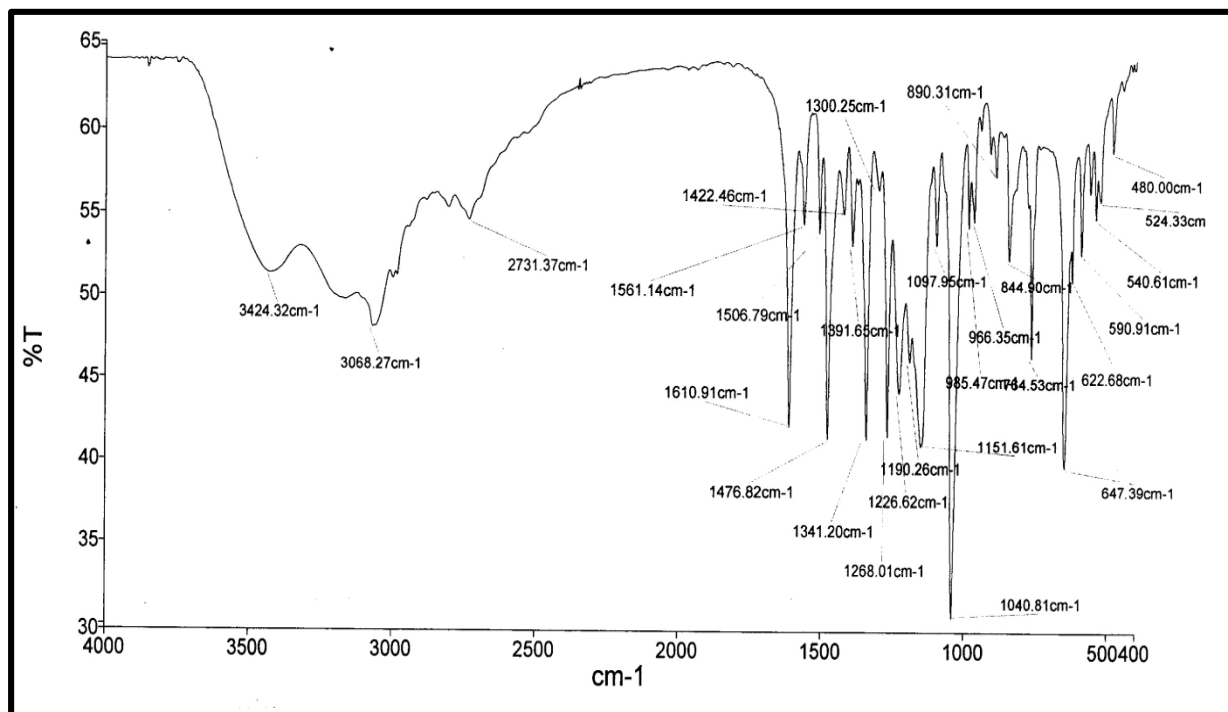

## Electronic Supplementary Information

Figure S4: HRMS of R1:

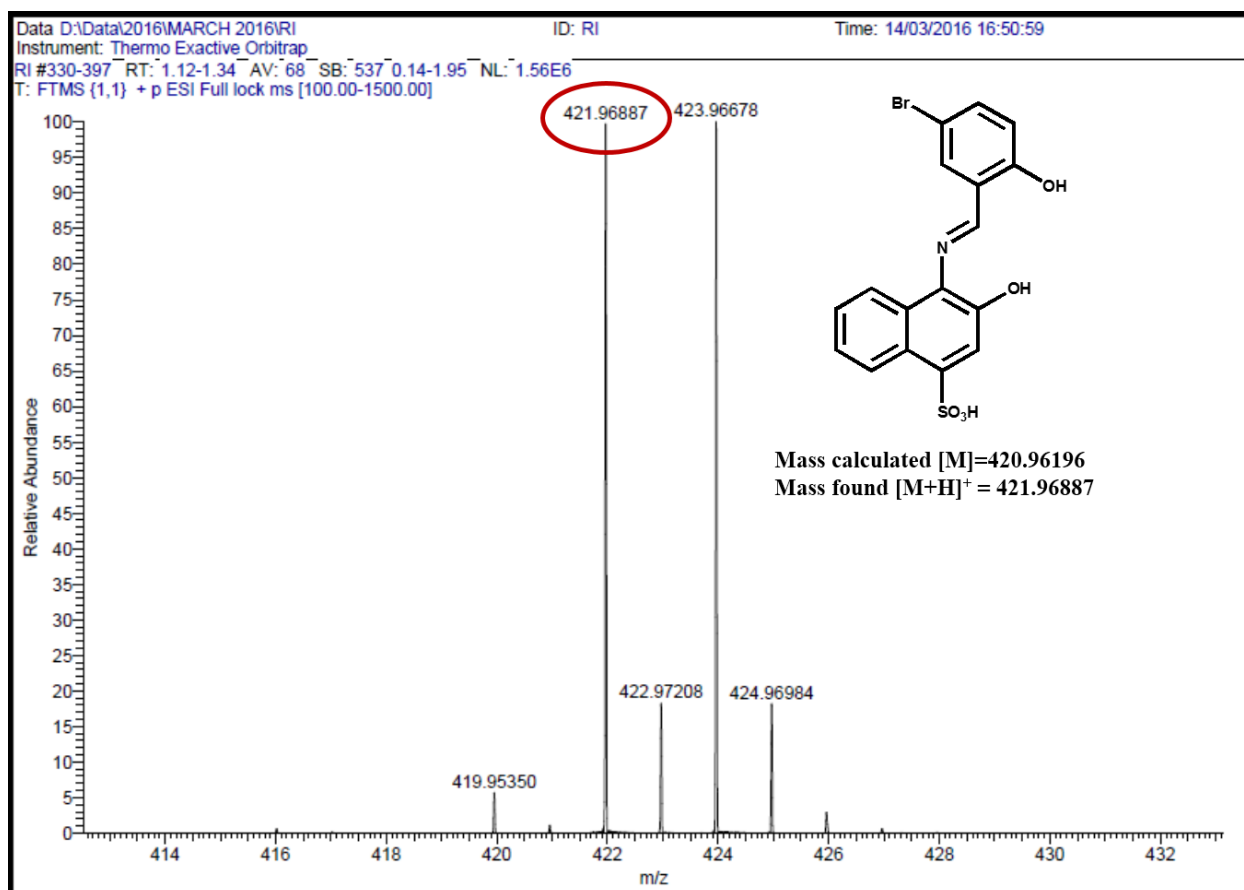

## Electronic Supplementary Information

**Figure S5:**  $^1\text{H}$  NMR spectrum of **R2** (in  $\text{DMSO-}d_6$ ):

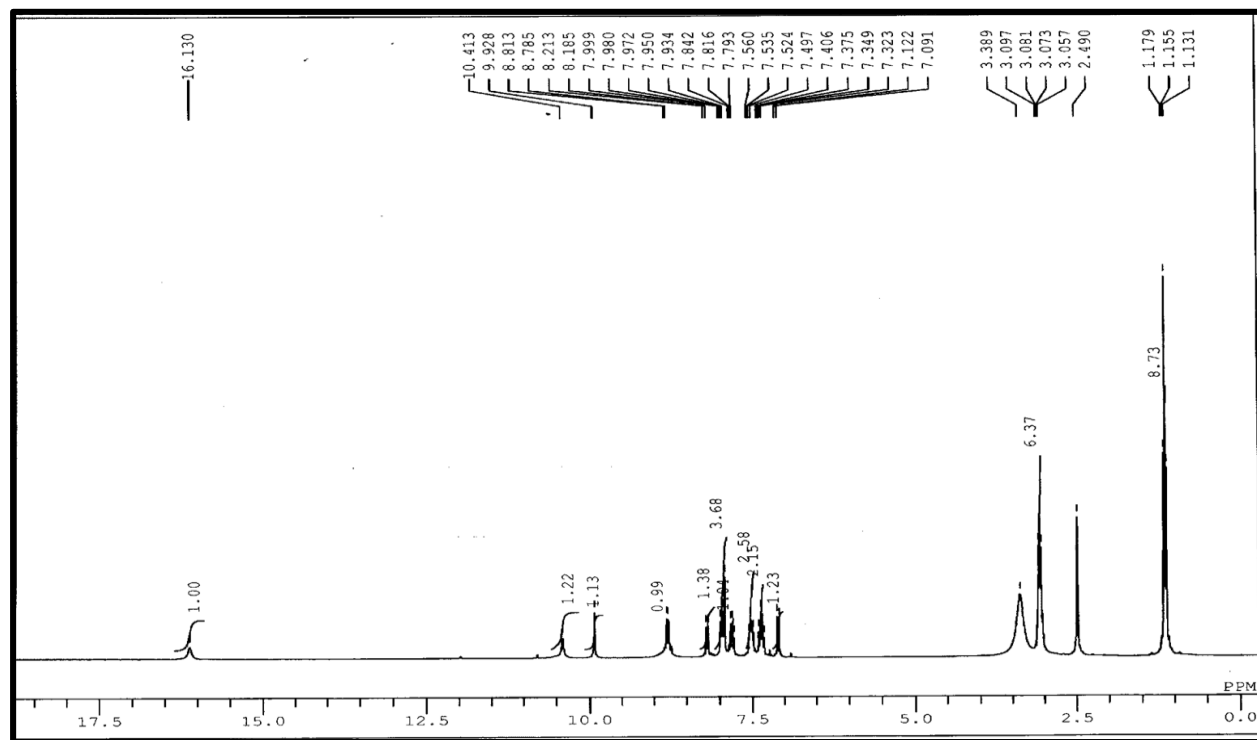



## Electronic Supplementary Information

**Figure S6:**  $^{13}\text{C}$  NMR spectrum of **R2** (in  $\text{DMSO}-d_6$ ):

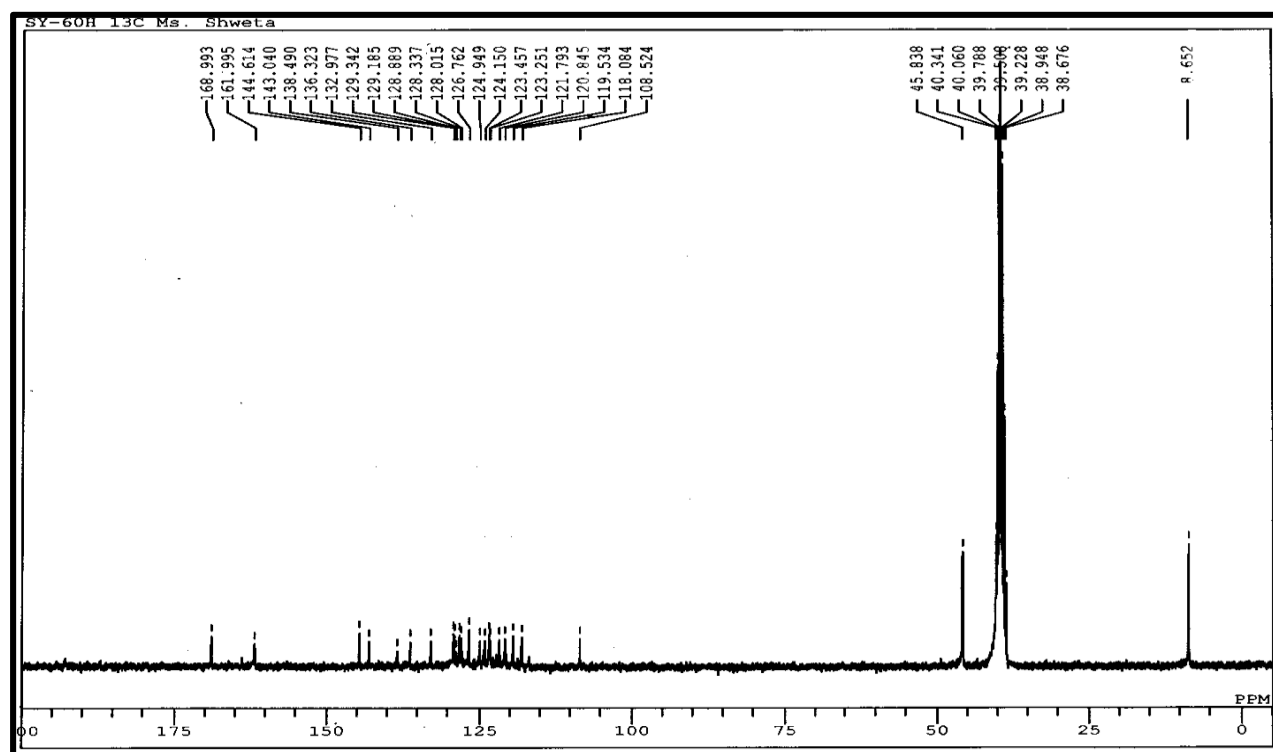

## Electronic Supplementary Information

Figure S7: IR spectrum of R2:

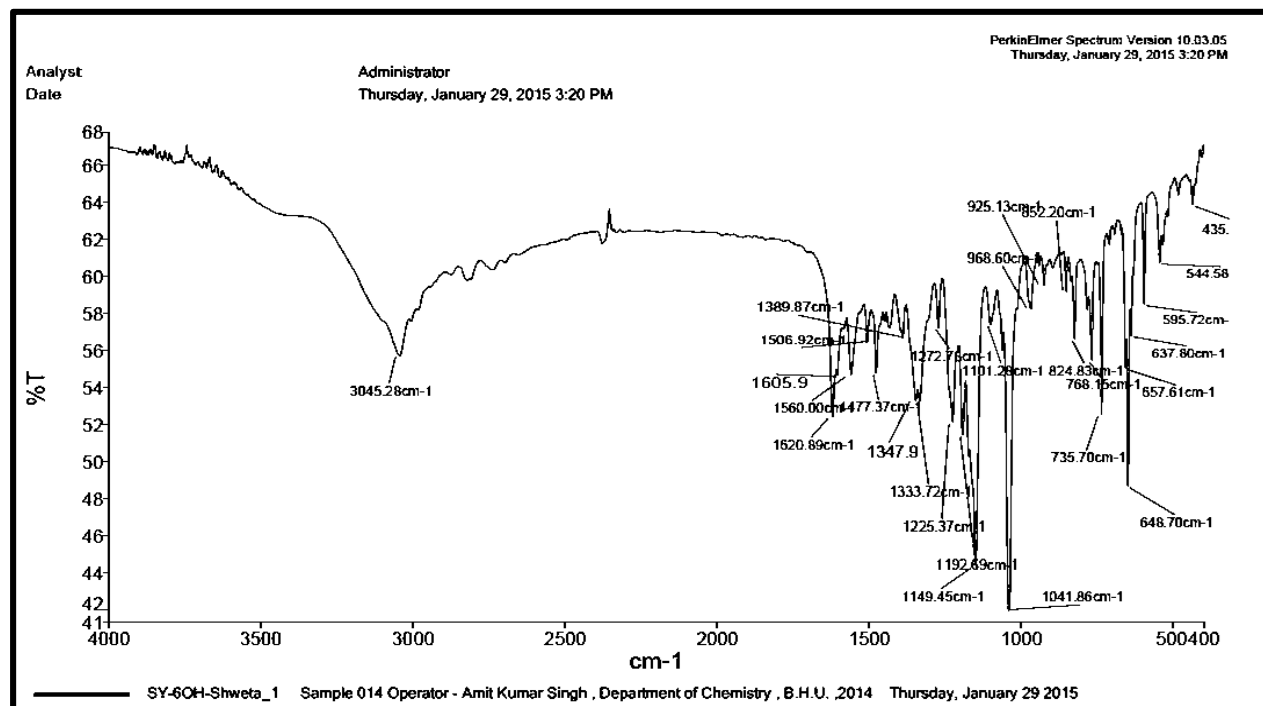

## Electronic Supplementary Information

**Fig S8: HRMS of R2:**

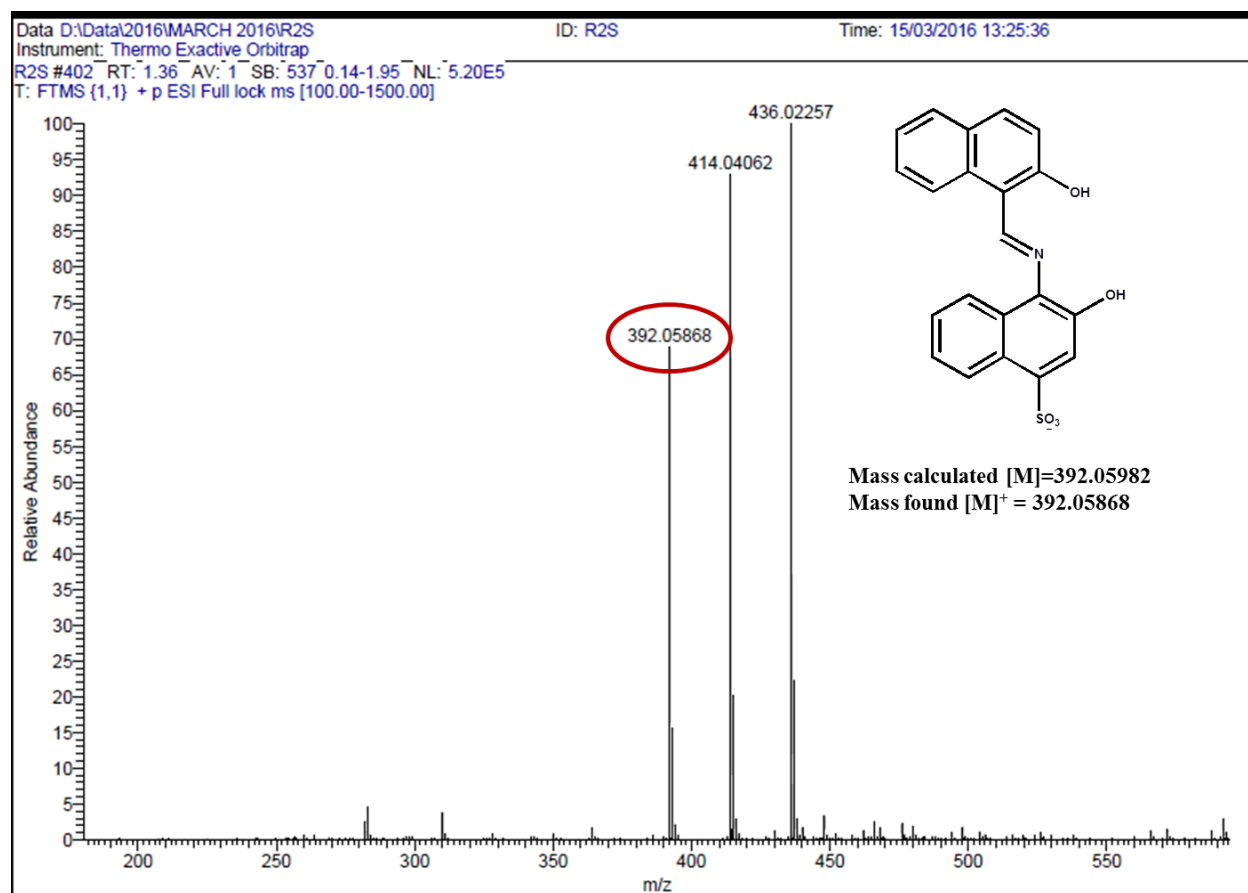

## Electronic Supplementary Information

**Fig S9:**  $^1\text{H}$  NMR spectrum of **R1-Al<sup>3+</sup>** Complex (in  $\text{DMSO-}d_6$ ):

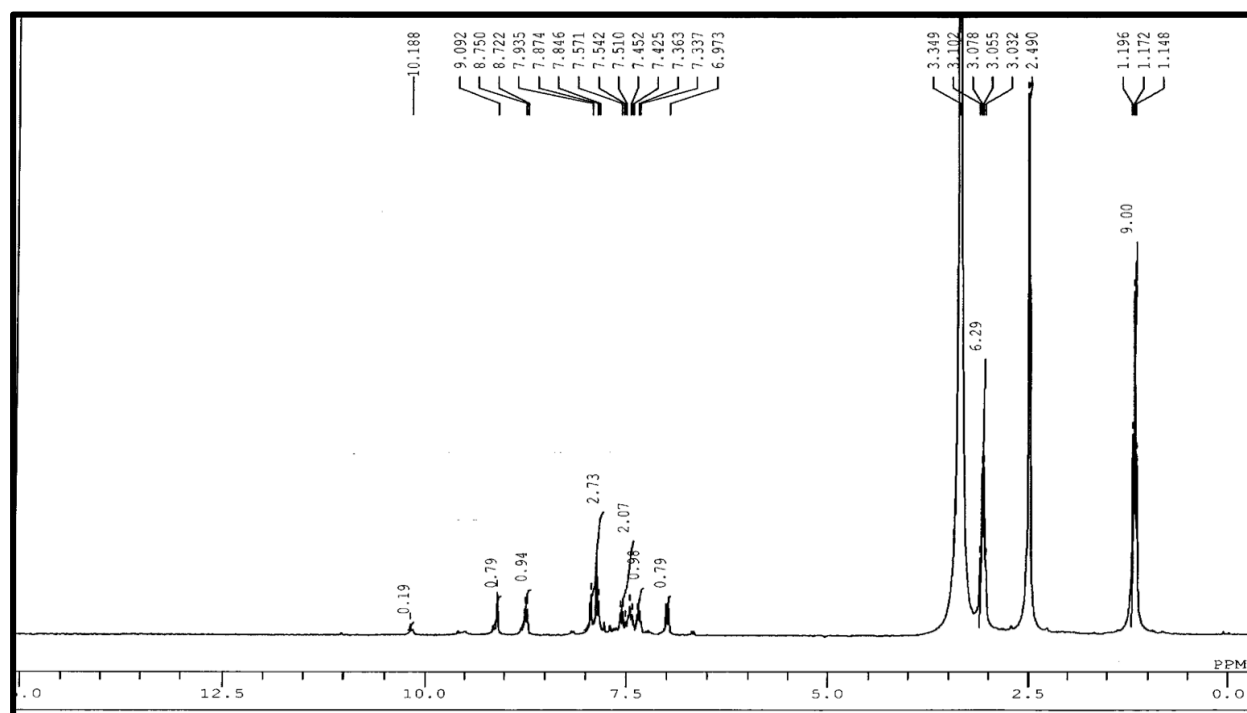

## Electronic Supplementary Information

**Fig S10:**  $^{13}\text{C}$  NMR spectrum of **R1**- $\text{Al}^{3+}$  Complex (in  $\text{DMSO-}d_6$ ):

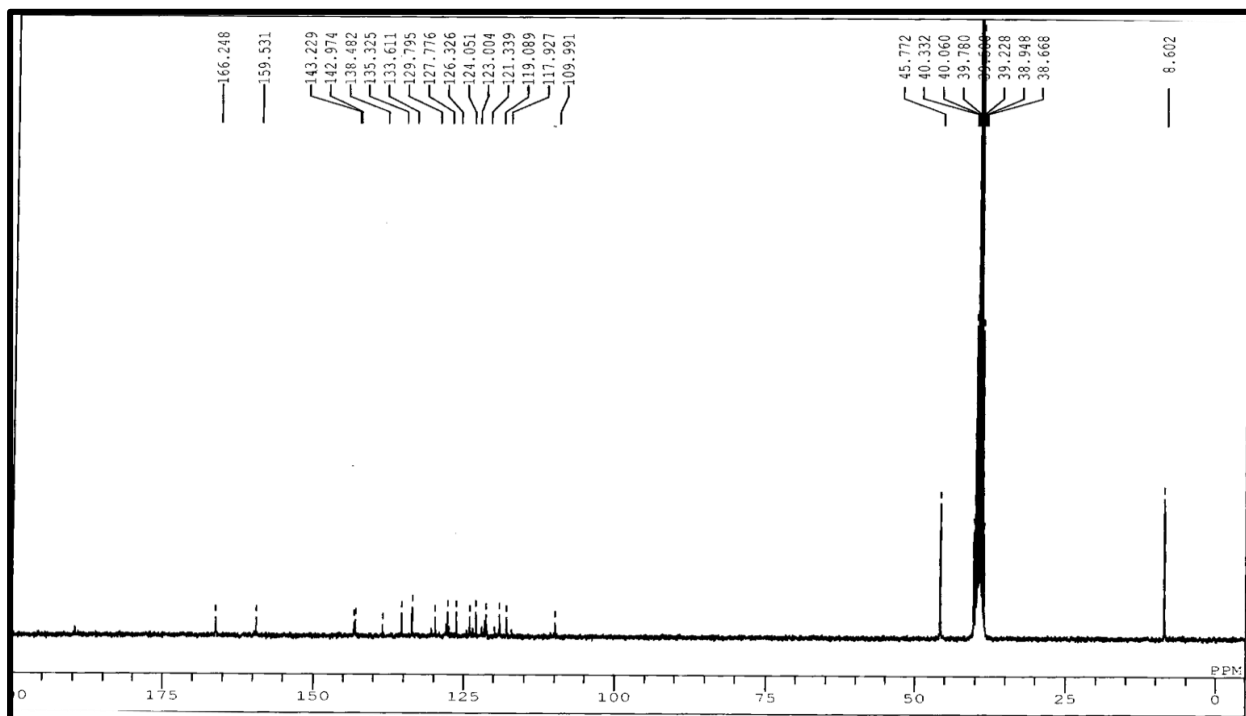

## Electronic Supplementary Information

Figure S11: IR spectrum of R1-Al<sup>3+</sup>:

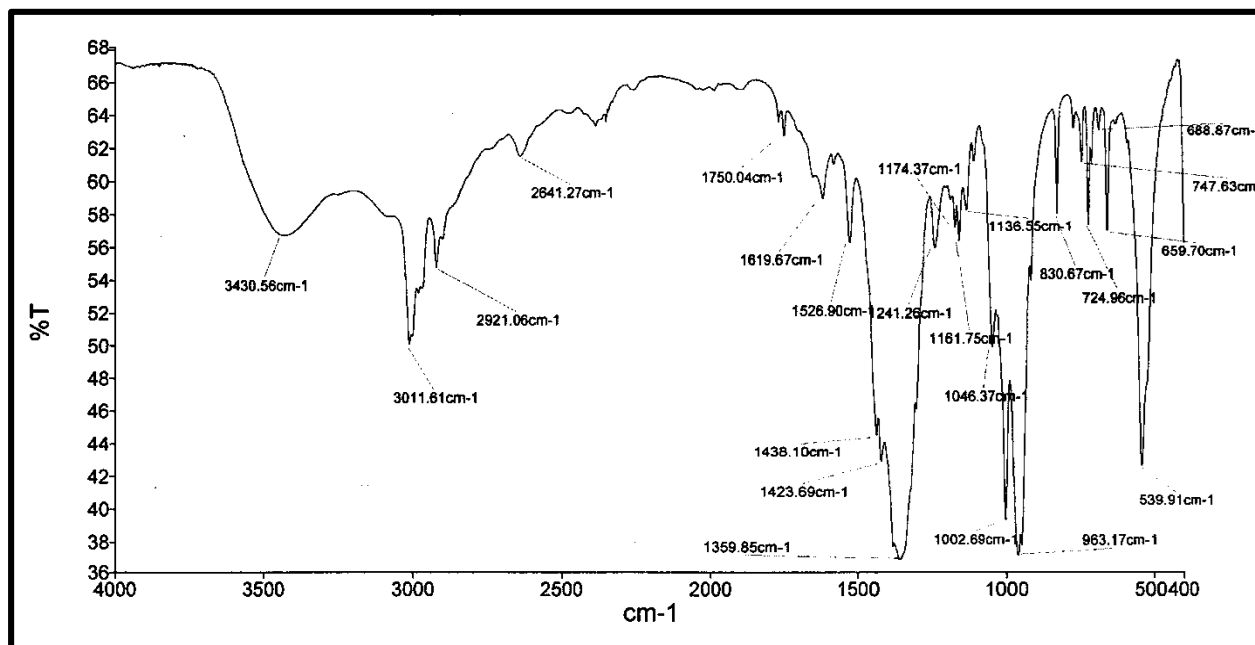

## Electronic Supplementary Information

Fig S12: HRMS of R1-Al<sup>3+</sup>:

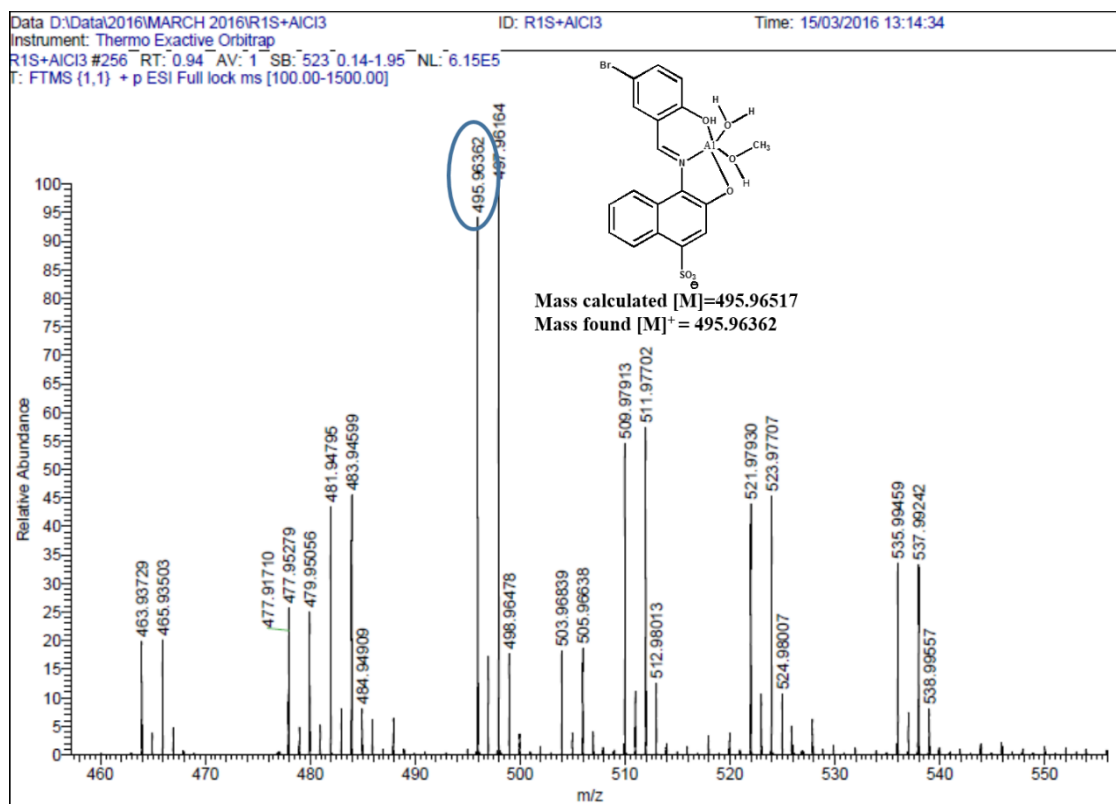

## Electronic Supplementary Information

**Fig S13:**  $^1\text{H}$  NMR spectrum of **R2**- $\text{Al}^{3+}$  Complex (in  $\text{DMSO-}d_6$ ):

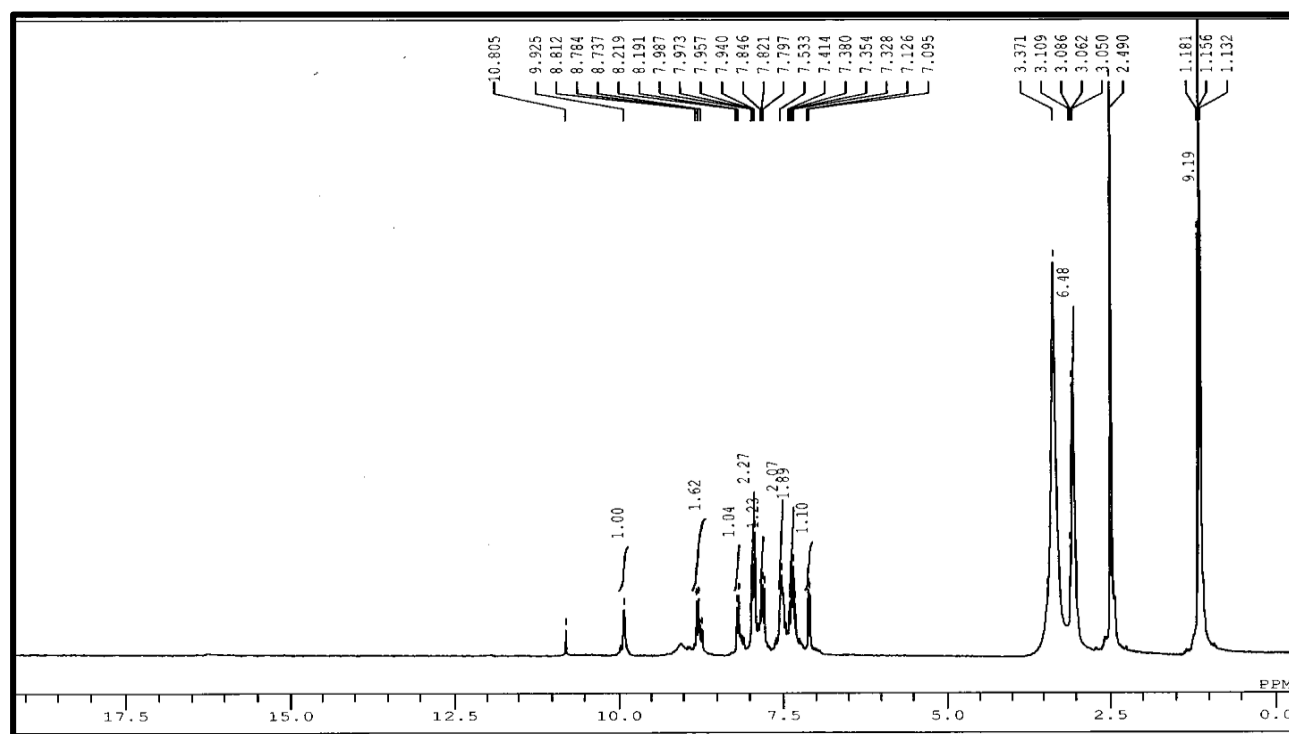



## Electronic Supplementary Information

**Figure S14:**  $^{13}\text{C}$  NMR spectrum of **R2** - $\text{Al}^{3+}$  Complex (in  $\text{DMSO-}d_6$ ):

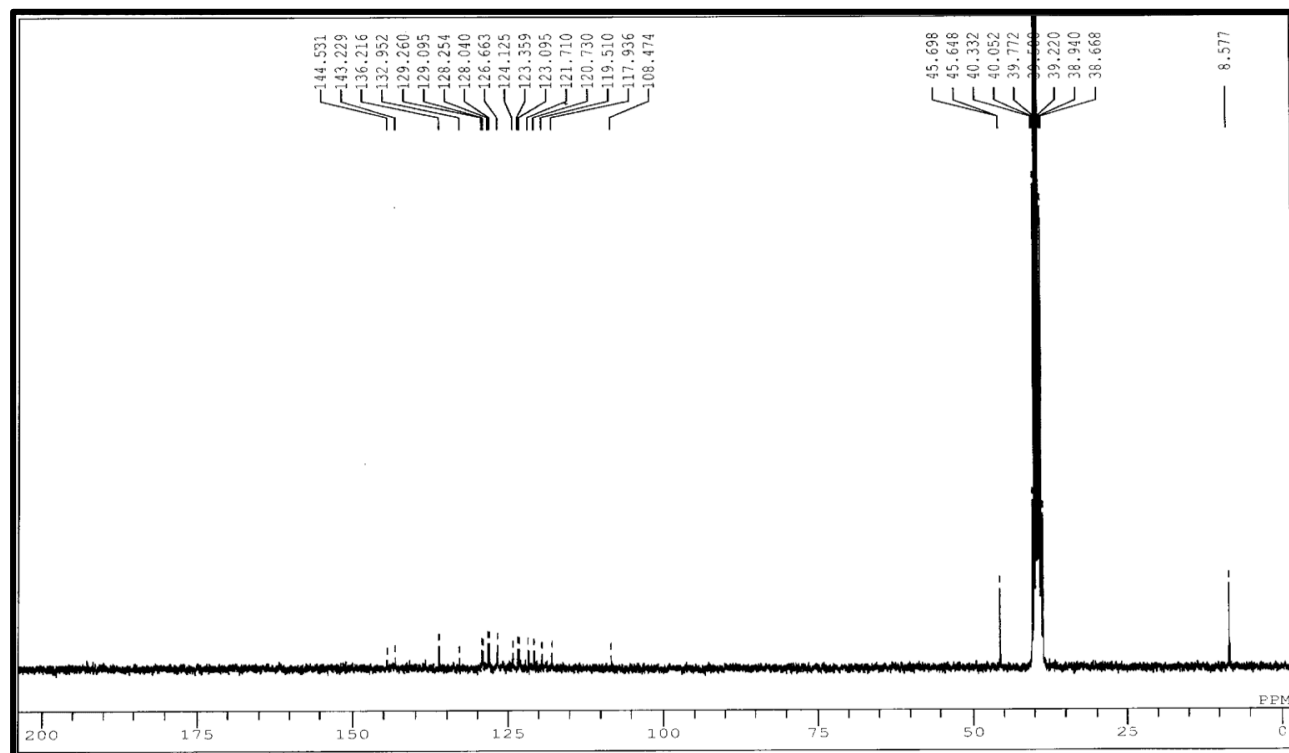

## *Electronic Supplementary Information*

**Figure S15:** IR spectrum of **R2-Al<sup>3+</sup>**:

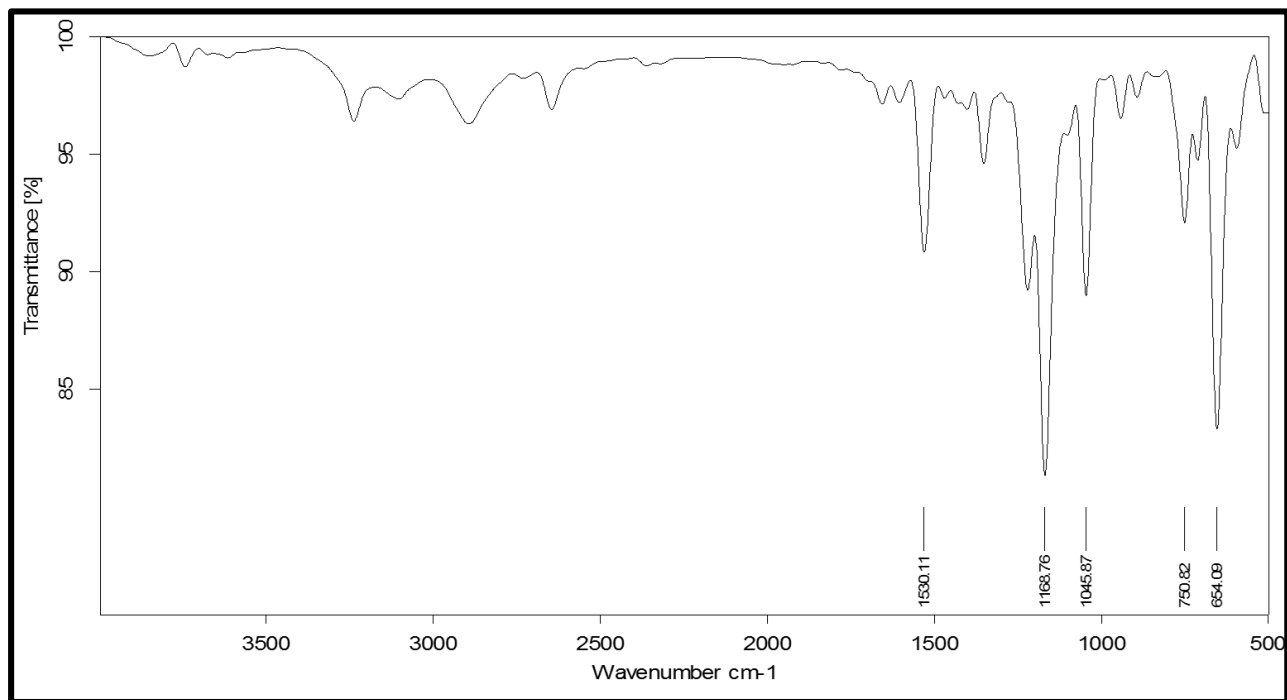

## Electronic Supplementary Information

**Figure S16:** HRMS of **R2**-Al<sup>3+</sup> complex:

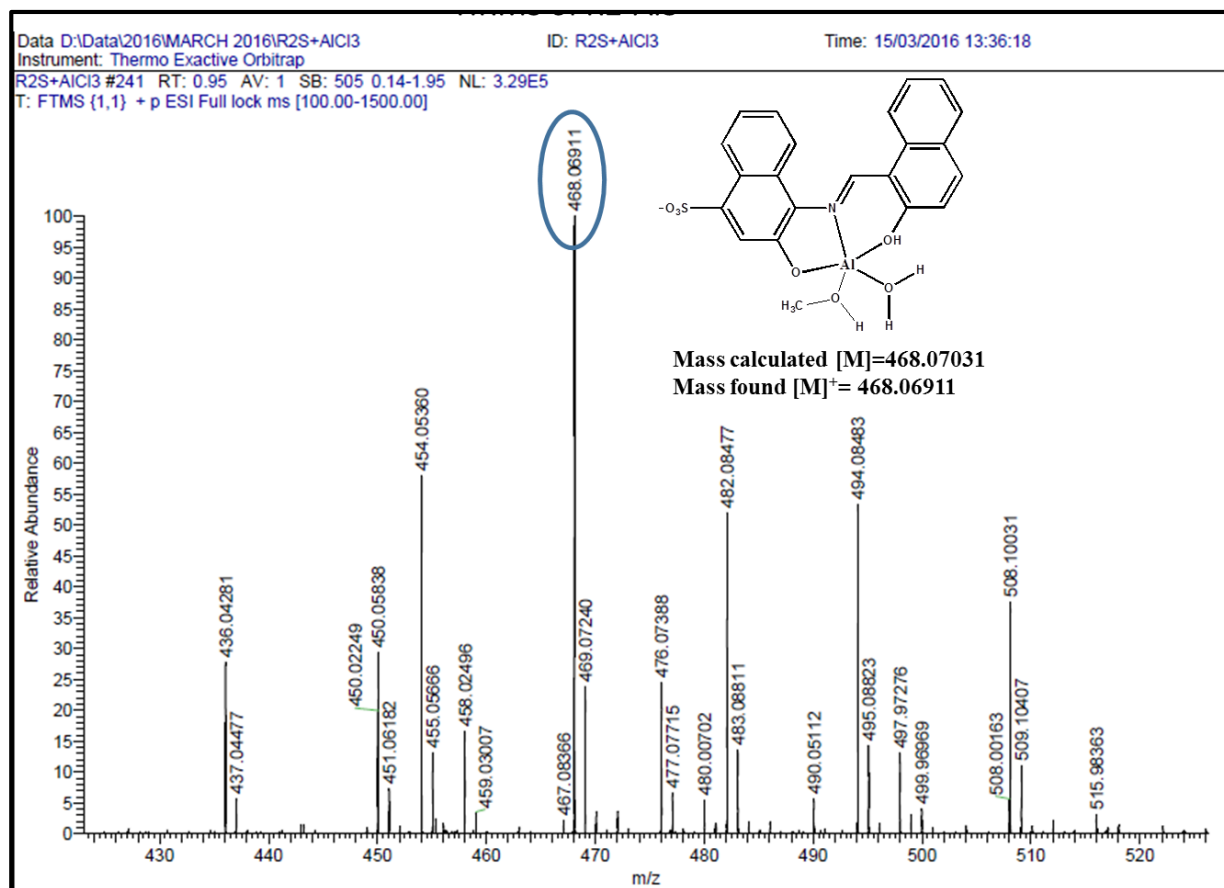

## Electronic Supplementary Information

**Figure S17:** Visible color responses of **R2** in the presence of various metal ions in ethanol-water (4: 1, v/v) solution:

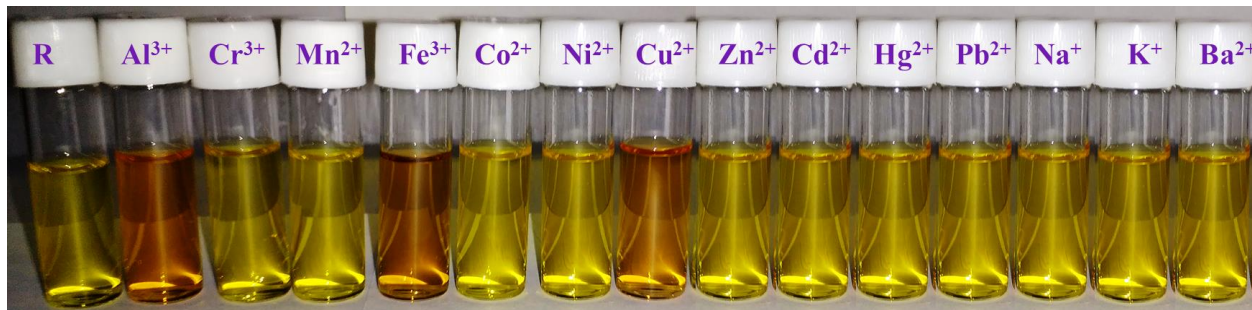

**Figure S18:** UV-visible spectrum of **R2** (10  $\mu$ M) with different metal ions at in ethanol-water (4: 1, v/v) solution:

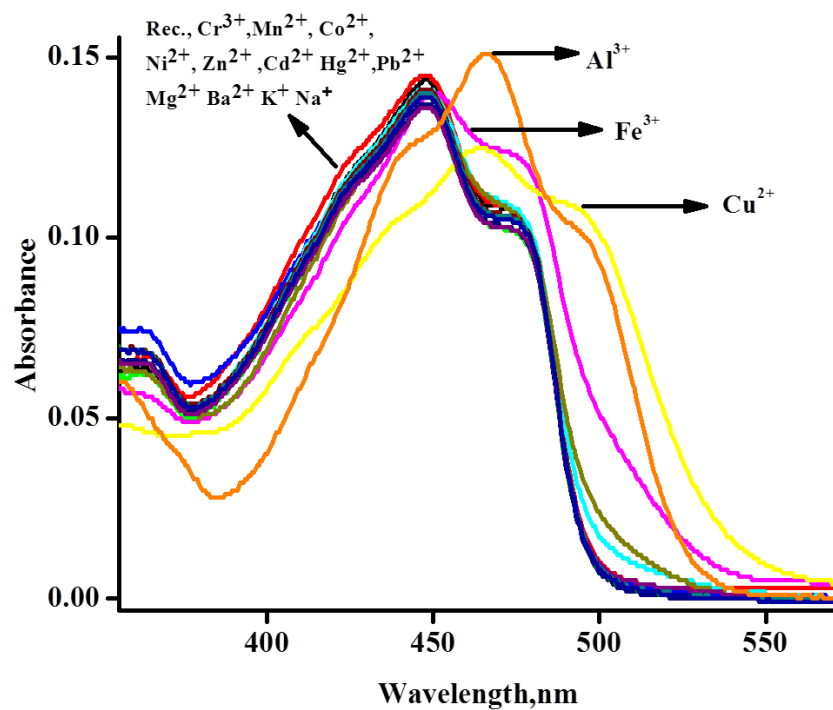

## Electronic Supplementary Information

**Figure S19:** Visible color responses of **R1** in the presence of various metal ions in ethanol-water (4: 1, v/v) solution:

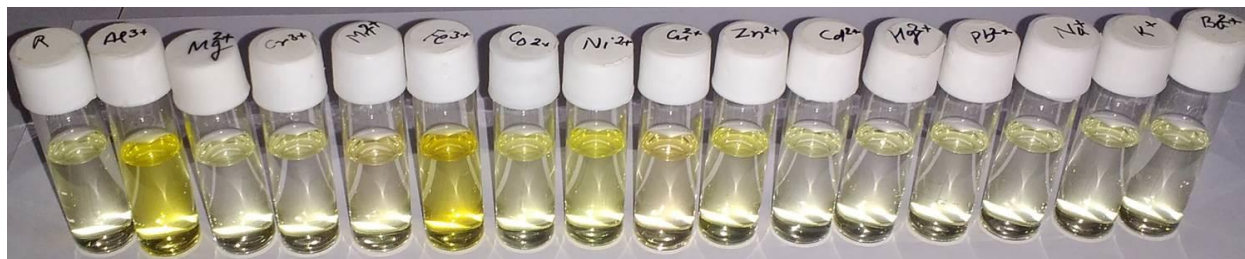

**Figure S20:** UV–visible spectrum of **R1** (10  $\mu$ M) with different metal ions at in ethanol-water (8: 2, v/v) solution:

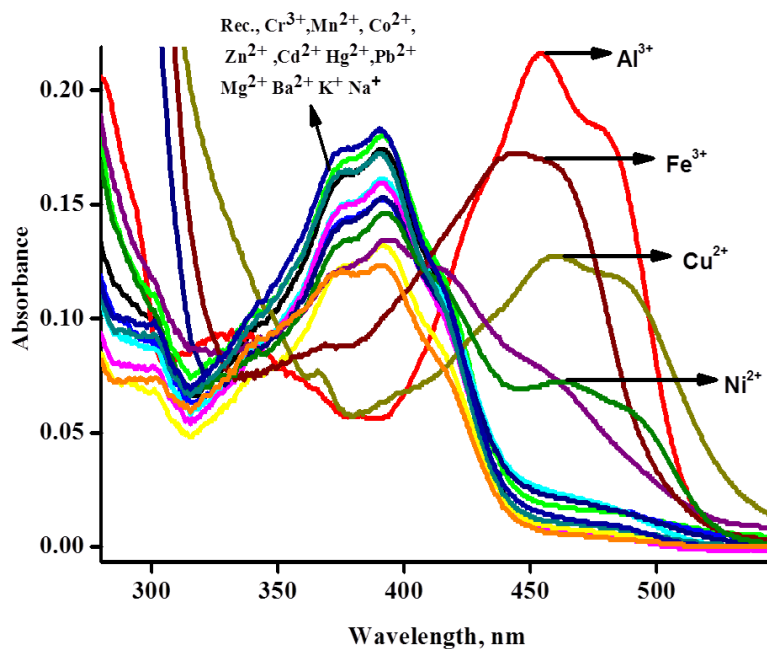

## Electronic Supplementary Information

**Figure S21:** Bar graph of emission spectrum showing competition experiment of **R1**.Al<sup>3+</sup> ensemble with various metal ions:

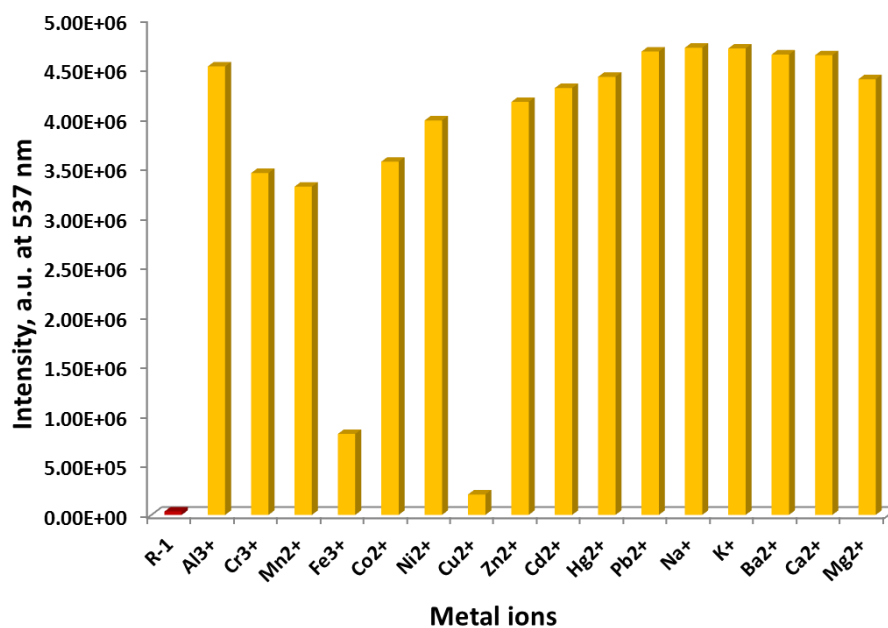

**Figure S22:** Bar graph of emission spectrum showing competition experiment of **R2**.Al<sup>3+</sup> ensemble with various metal ions:

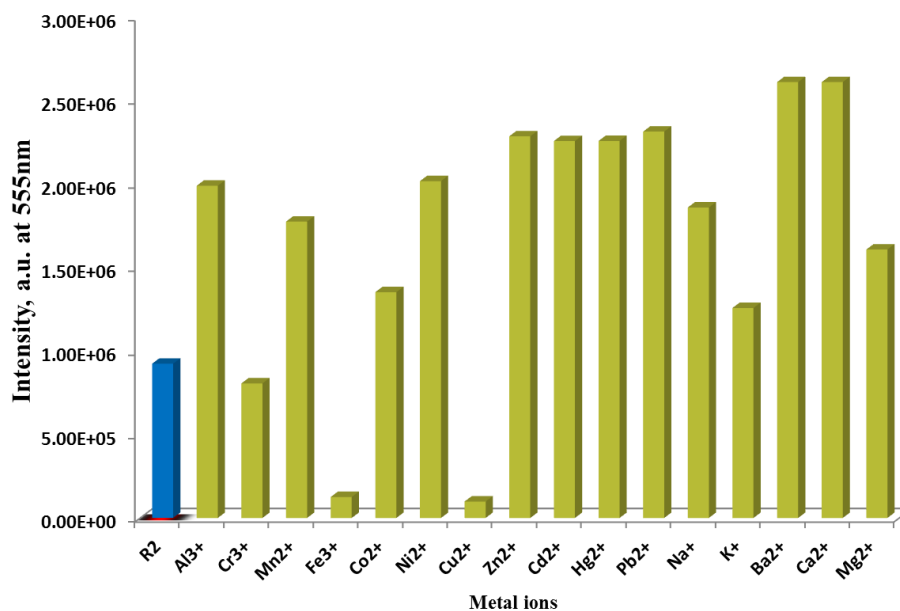

## Electronic Supplementary Information

**Figure S23:** The variation in fluorescence intensity in **R1** with the change in pH in the presence of  $\text{Al}^{3+}$ :

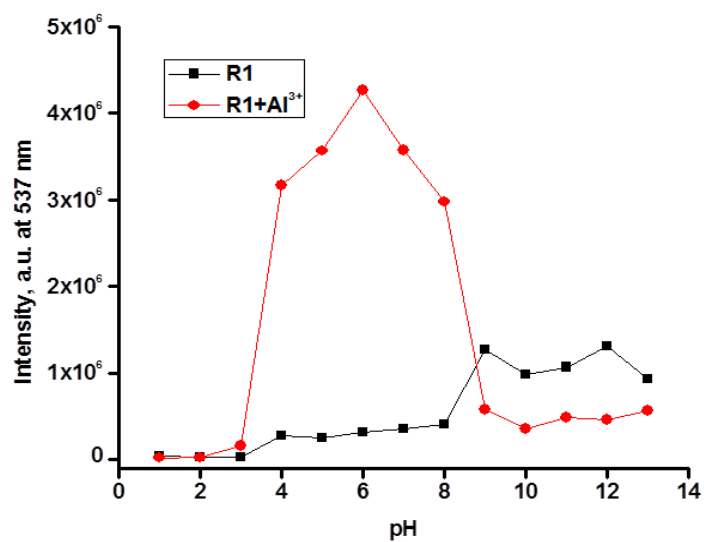

**Figure S24:** The variation in fluorescence intensity in **R2** with the change in pH in the presence of  $\text{Al}^{3+}$ :

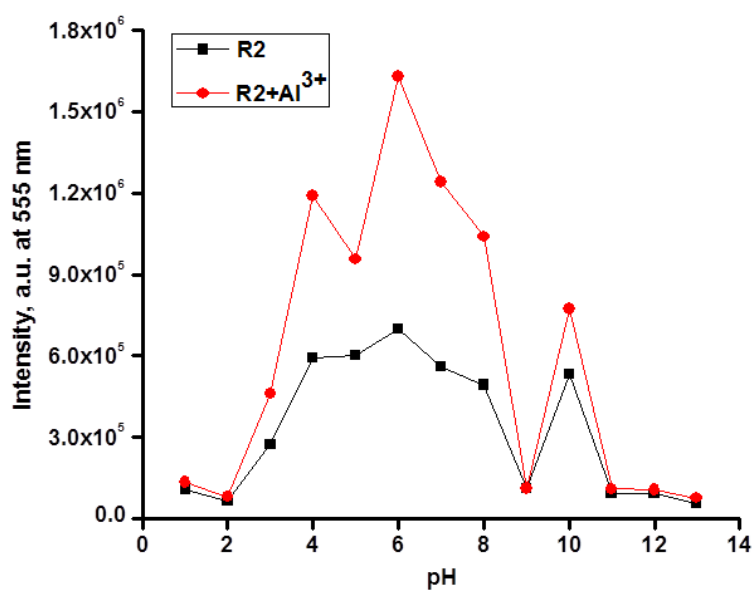

## Electronic Supplementary Information

**Figure S25:** Job's plot of **R1** with  $\text{Al}^{3+}$  showing 1: 1 binding stoichiometry:

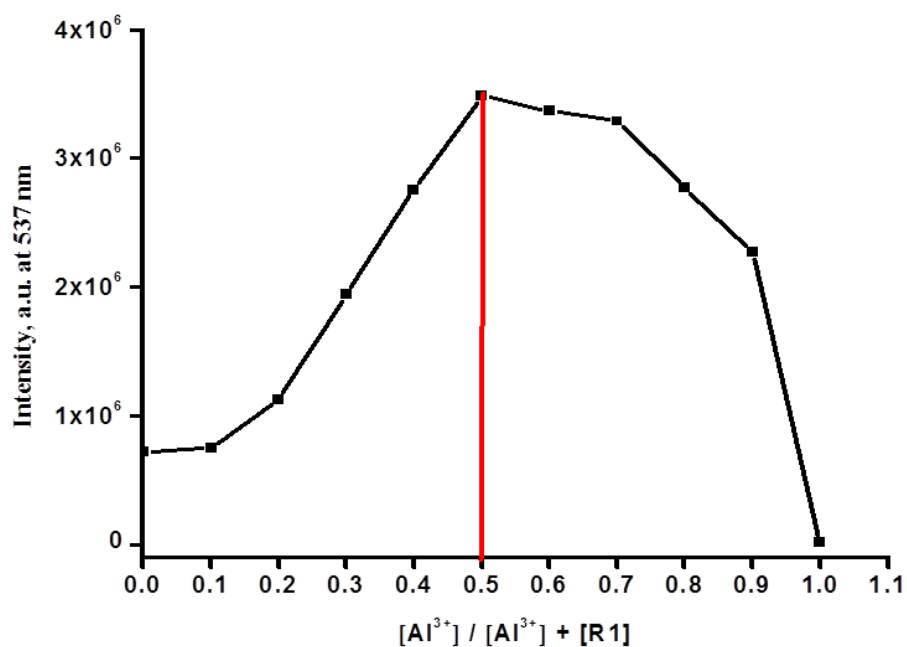

**Figure S26:** Job's plot of **R2** with  $\text{Al}^{3+}$  showing 1:1 binding stoichiometry:

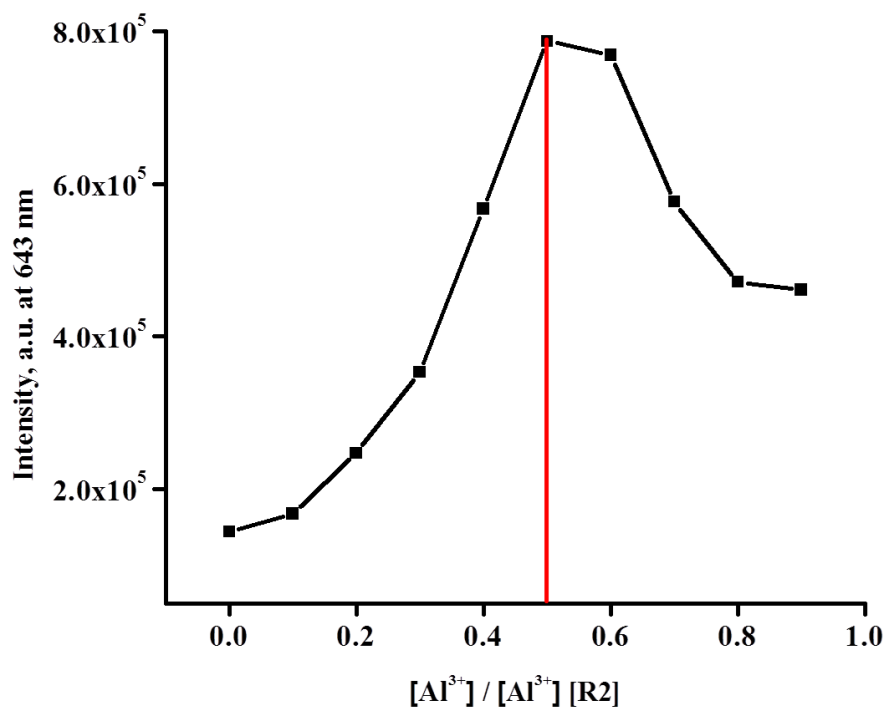



## Electronic Supplementary Information

**Figure S27:** Non-linear fit plot of **R1** from fluorescence titration data:

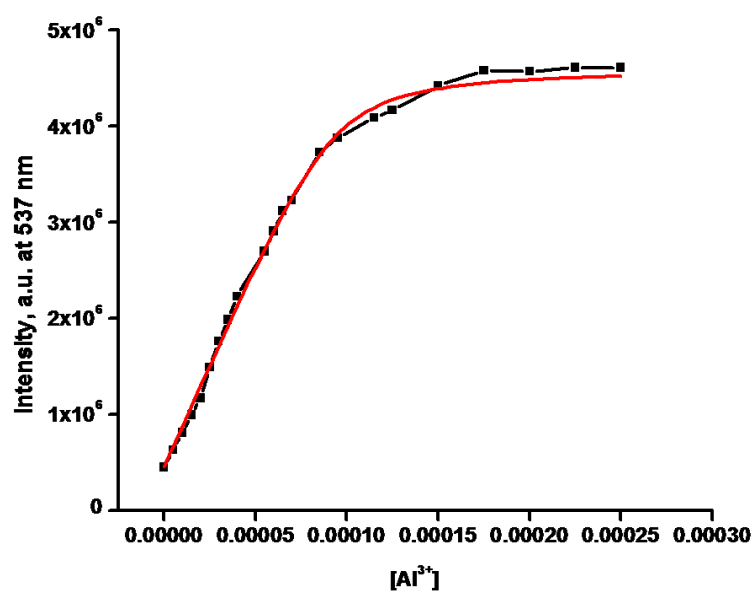

**Figure S28:** Non-linear fit plot of **R2** from fluorescence titration data:

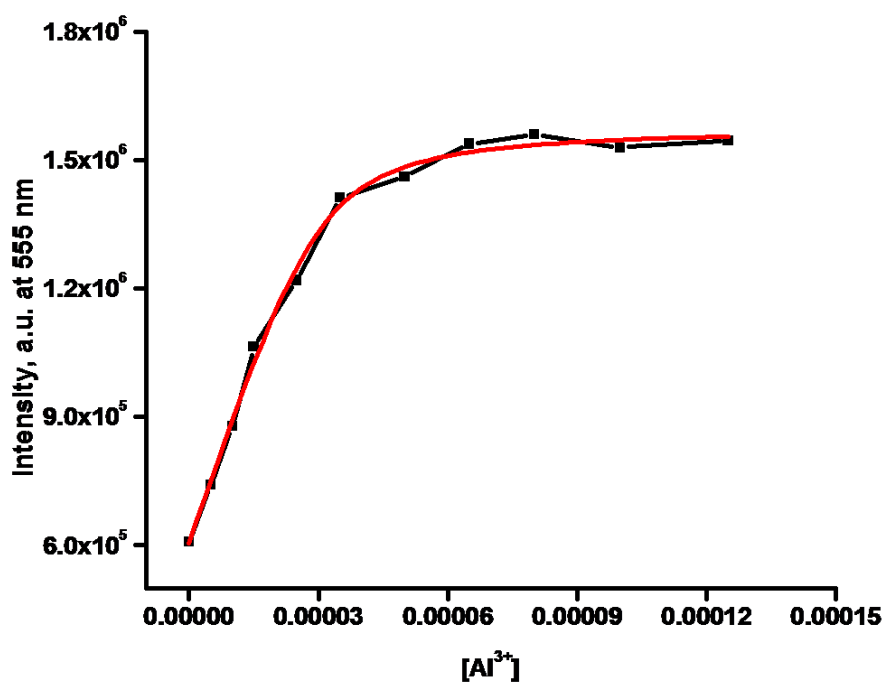

## Electronic Supplementary Information

**Figure S29:** Calibration curve for determination of detection limit of **R1** for  $\text{Al}^{3+}$ :

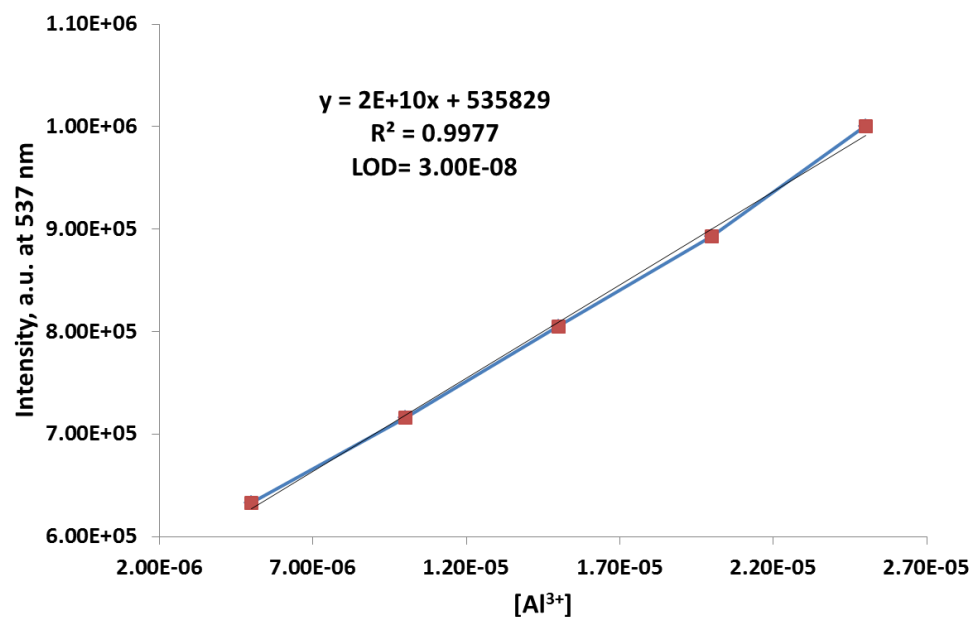

**Figure S30:** Calibration curve for determination of detection limit of **R2** for  $\text{Al}^{3+}$ :

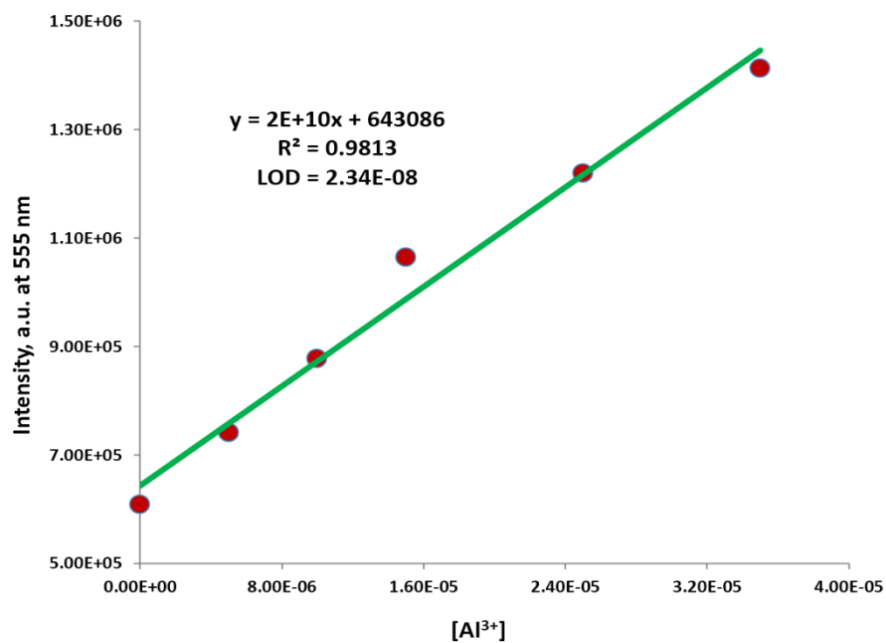

## *Electronic Supplementary Information*

**Figure S31:** Theoretically optimised structure of **R1** and **R1-Al<sup>3+</sup>** ensemble:

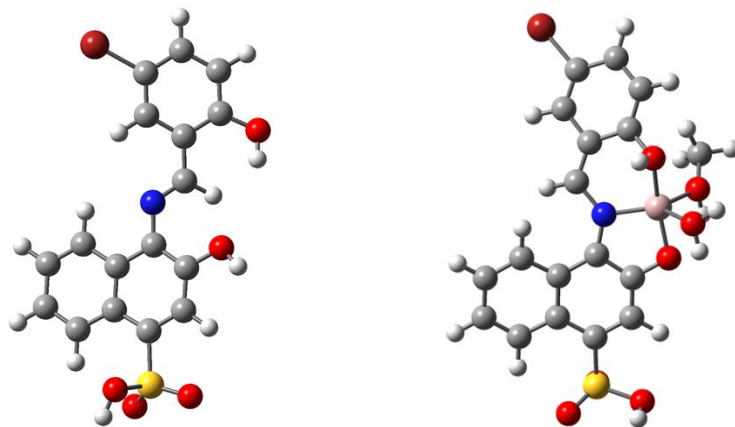

**Figure S32:** Theoretically optimised structure of **R2** and **R2-Al<sup>3+</sup>** ensemble:

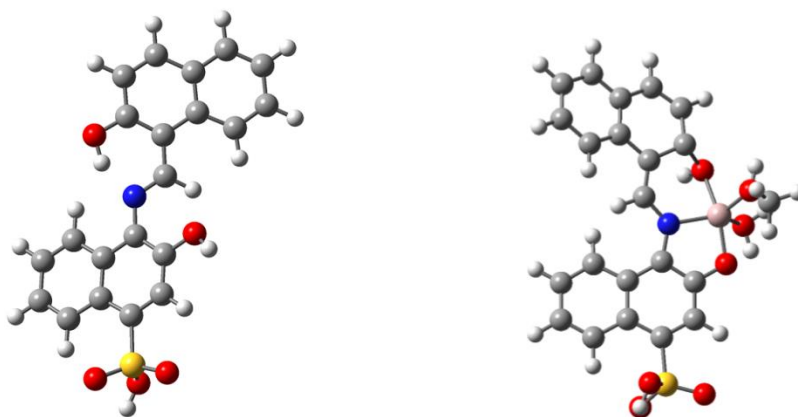

Supplement: c6ra01385f1.pdf [file c6ra01385f1.pdf]
